# Supplementary material for: Large-scale synthesis of uniformly dispersed hexagram-like gibbsite by a controlled replacement reaction
Source: Royal Society of Chemistry journal article supplement (doi:10.1039/c7ce00822h), 2017-01-01
Supplement: c7ce00822h1.pdf [file c7ce00822h1.pdf]

## Large-scale synthesis of uniformly dispersed hexagram like gibbsite by a controlled replacement reaction

Chunxi Hai,<sup>a,b,†</sup> Yuan Zhou,<sup>a,b,†</sup> Lijuan Zhang,<sup>a,b,d</sup> Yanxia Sun,<sup>a,b</sup> Xiang Li,<sup>a,b</sup> Yue Shen,<sup>a,b</sup> Huaijin Zhan,<sup>c</sup> Qier Han,<sup>c</sup> Jianghua Liu,<sup>d</sup> and Hongbo Ren<sup>d</sup>

<sup>a</sup>Key Laboratory of Comprehensive and Highly Efficient Utilization of Salt Lake Resources, Qinghai Institute of Salt Lakes, Chinese Academy of Sciences, 18<sup>th</sup> Xinning Road, Xining 810008, China

<sup>b</sup>Key Laboratory of Salt Lake Resources Chemistry of Qinghai Province

<sup>c</sup>No.3 Baiyizhonglu, Qinghai Nationalities University, Chengdong District, Xining 810007, China

<sup>d</sup>Shengnuo Optoelectronic Technology (QH) Co. Ltd., Xining 810000, China

\*Corresponding Authors E-mail: [haicx@isl.ac.cn](mailto:haicx@isl.ac.cn), [zhouy@isl.ac.cn](mailto:zhouy@isl.ac.cn)

Tel.: +86-971-630-1695

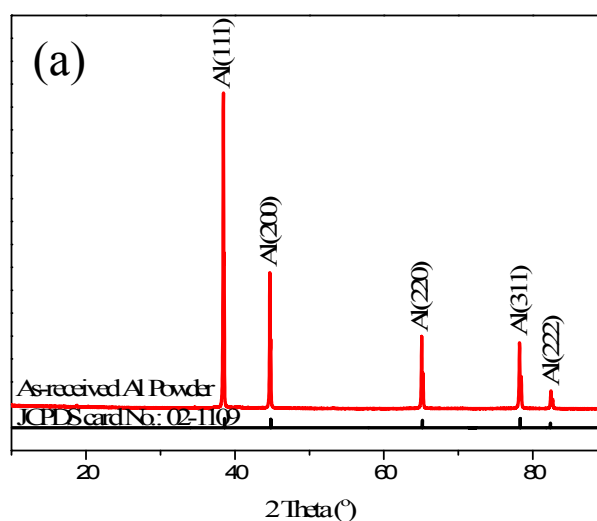

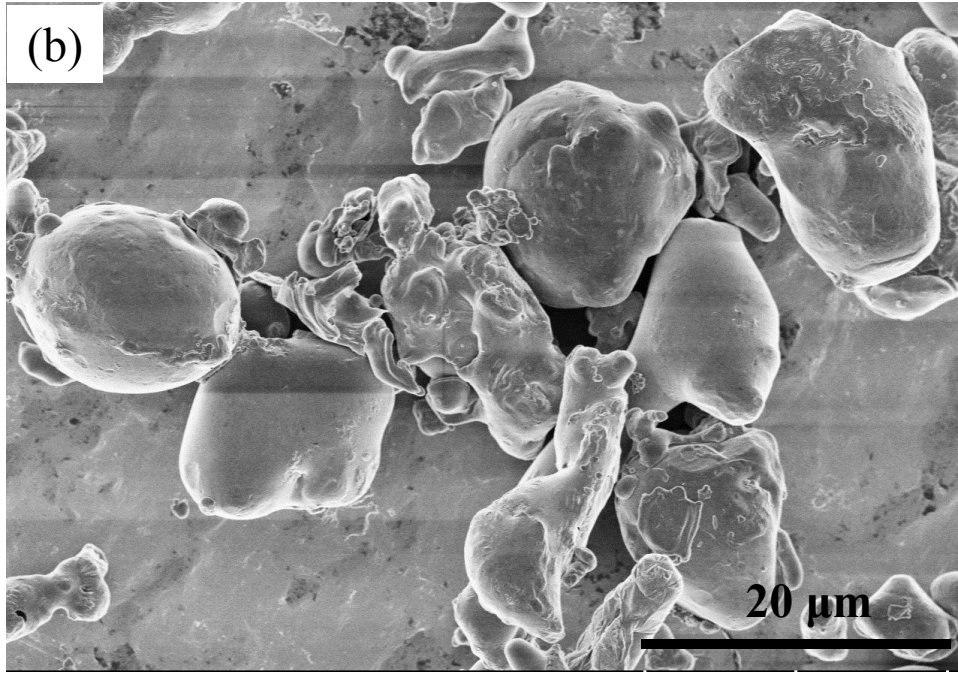

**Fig. S1.** (a) XRD pattern and (b) SEM image of as-received Al powder.
